# Supplementary material for: N-glycosylation of GDF15 abolishes its inhibitory effect on EGFR in AR inhibitor-resistant prostate cancer cells
Source: PubMed Central journal article supplement (PMC9296468; doi:10.1038/s41419-022-05090-3), 2022-07-19
Supplement: 41419_2022_5090_MOESM2_ESM.pdf [file 41419_2022_5090_MOESM2_ESM.pdf]

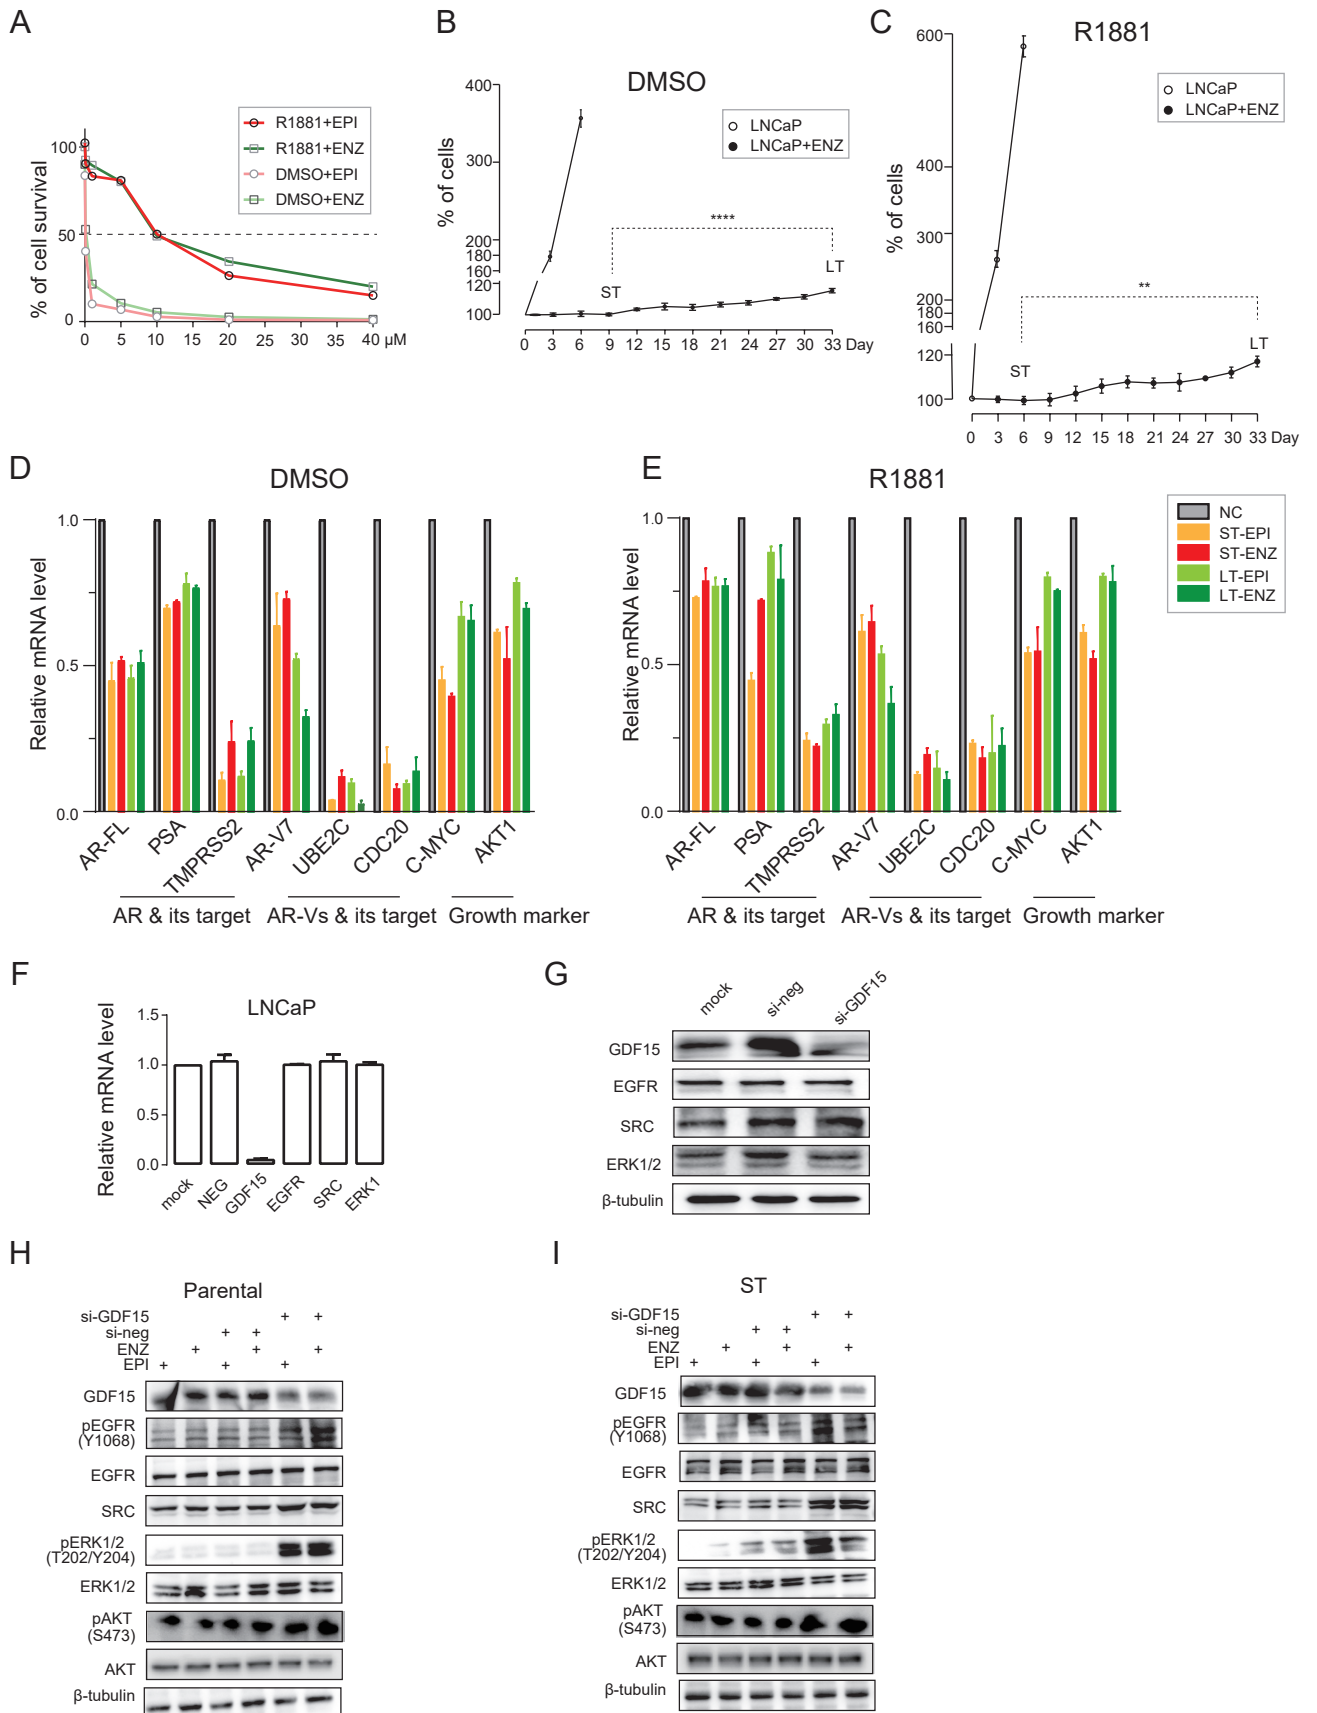

Figure S1
