# Supplementary material for: N-glycosylation of GDF15 abolishes its inhibitory effect on EGFR in AR inhibitor-resistant prostate cancer cells
Source: PubMed Central journal article supplement (PMC9296468; doi:10.1038/s41419-022-05090-3), 2022-07-19

Uncropped scans of the Western blots shown in the indicated figures

Fig. 1e

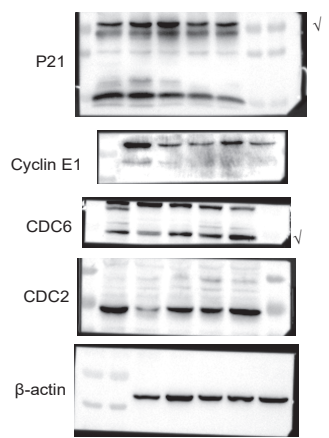

Fig. 1f

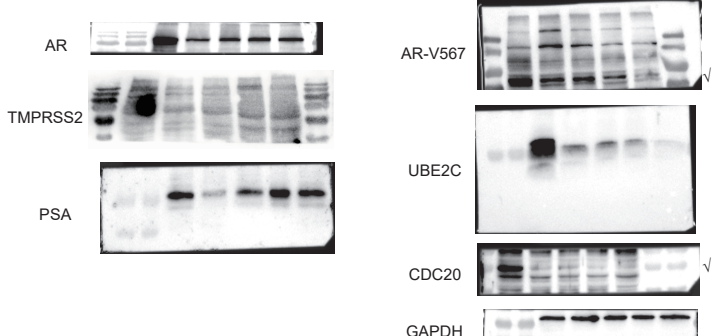

Fig. 3b

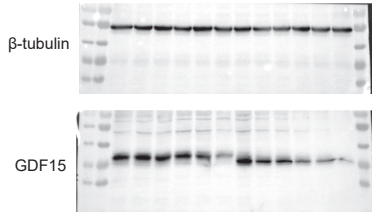

Fig. 3d

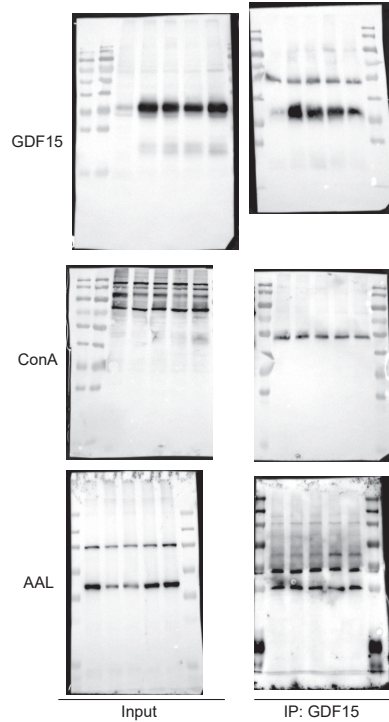

Fig. 3c

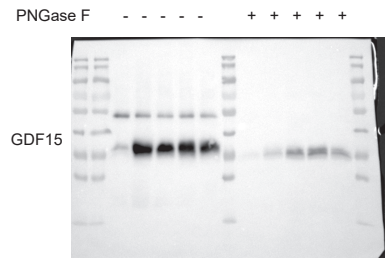

Fig. 5a

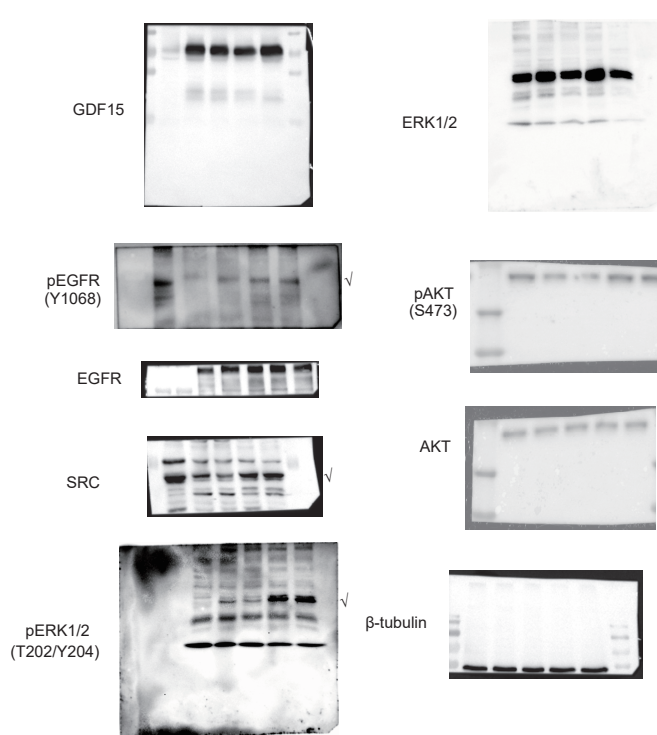

Fig. 5d

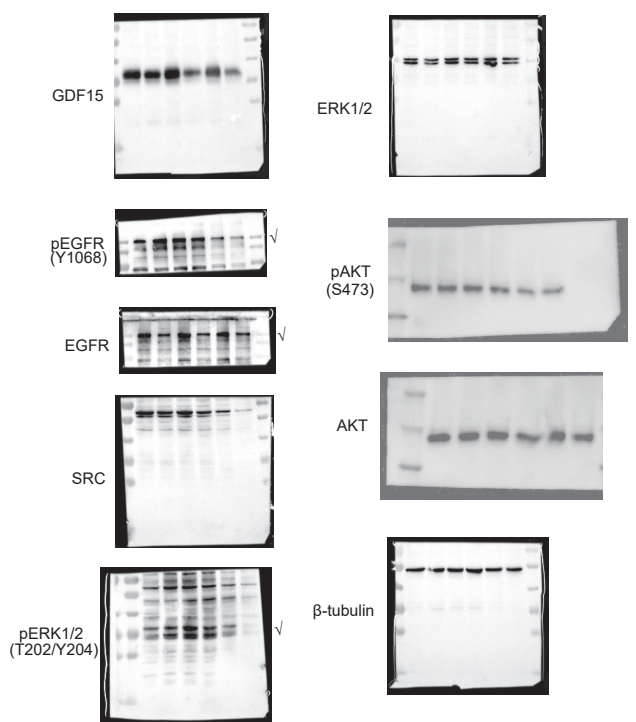

Fig. 5g

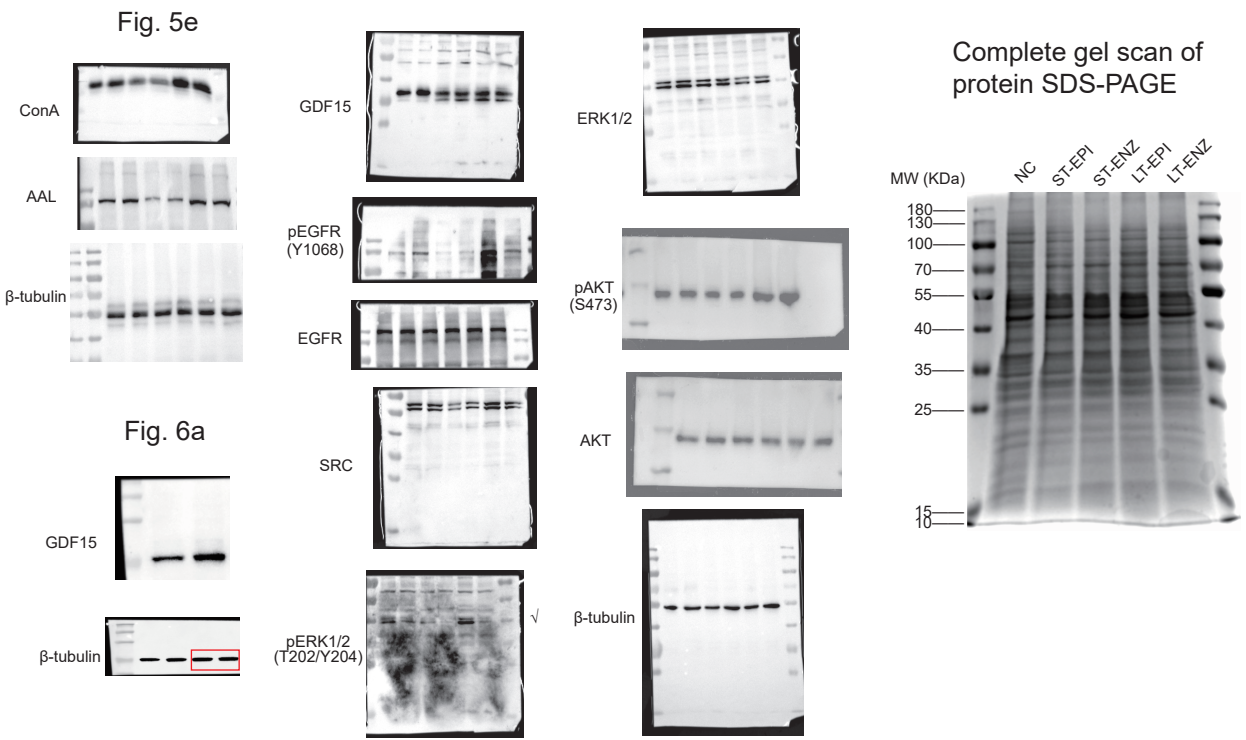

Fig. 5e

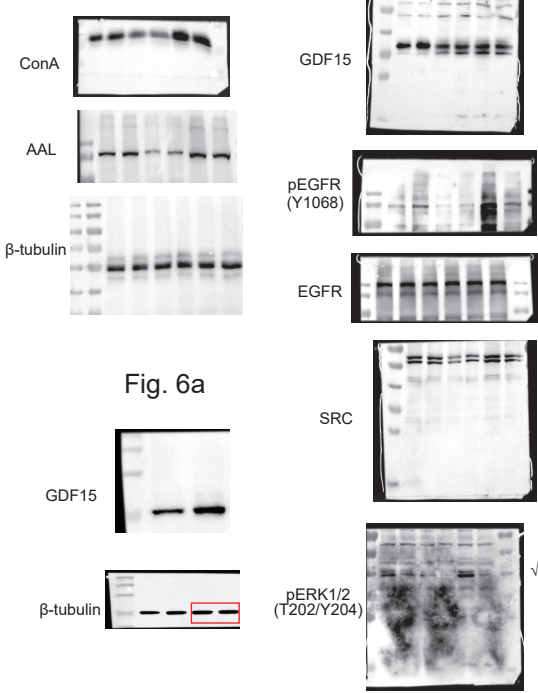

Fig. 6a

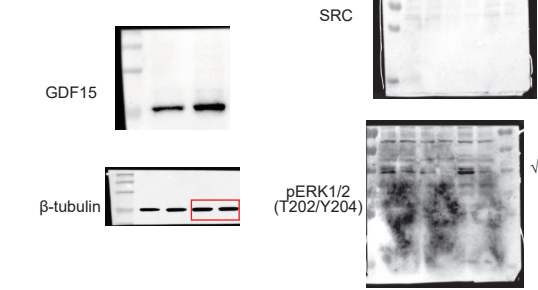

Fig. 6d

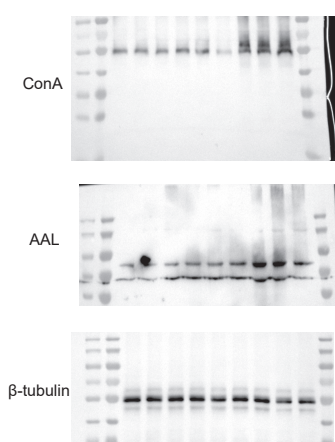

Fig. S1g

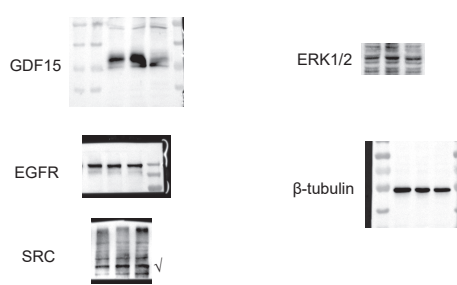

Fig. S1i

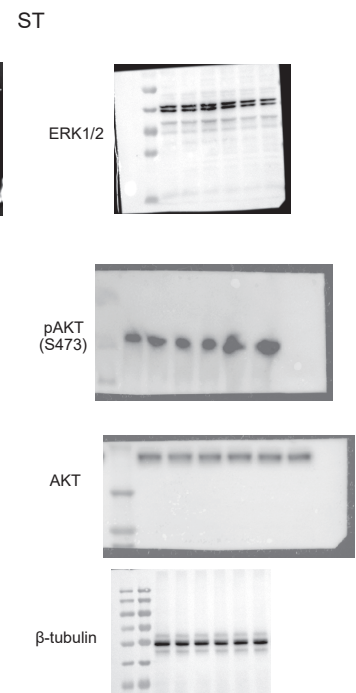

Fig. S1h

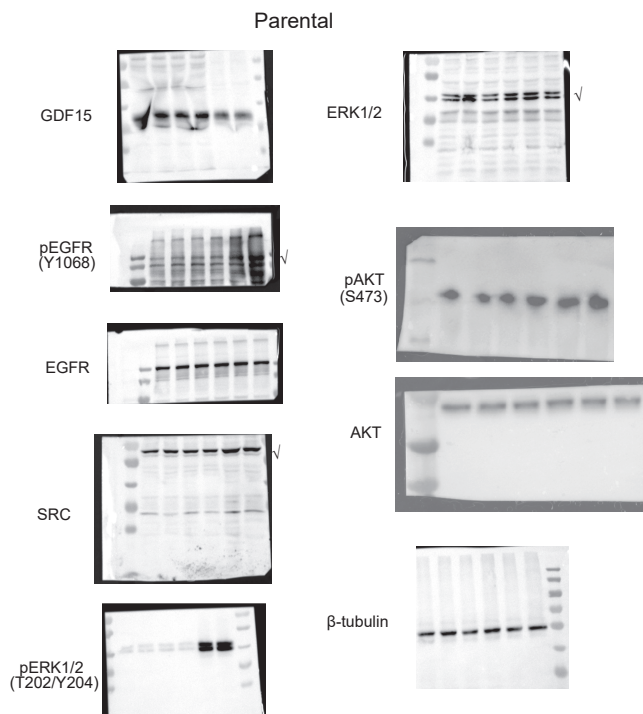

Supplement: 41419_2022_5090_MOESM3_ESM.pdf [file 41419_2022_5090_MOESM3_ESM.pdf]
