# Supplementary material for: N-glycosylation of GDF15 abolishes its inhibitory effect on EGFR in AR inhibitor-resistant prostate cancer cells
Source: PubMed Central journal article supplement (PMC9296468; doi:10.1038/s41419-022-05090-3), 2022-07-19
Supplement: 41419_2022_5090_MOESM11_ESM.pdf [file 41419_2022_5090_MOESM11_ESM.pdf]

# STR 细胞鉴定结题报告

订单编号: F21FTSCCLH0036

报告时间: 2021.06.11

# 目录

|                             |   |
|-----------------------------|---|
| 1 实验目的.....                 | 3 |
| 2 实验流程.....                 | 3 |
| 2.1 实验试剂.....               | 3 |
| 2.2 实验仪器.....               | 3 |
| 2.3 实验步骤.....               | 3 |
| 2.4 上机检测.....               | 3 |
| 3 实验结果.....                 | 4 |
| 3.1 LNCaP STR 数据.....       | 4 |
| 3.2 LNCaP STR 位点数据比对结果..... | 5 |
| 3.3 LNCaP STR 图谱.....       | 5 |
| 4. 参考文献.....                | 6 |

# 1 实验目的

细胞 STR 信息鉴定：LNCaP clone FGC (人前列腺癌细胞)

## 2 实验流程

### 2.1 实验试剂

人类 DNA 分型盒 (炎黄)

### 2.2 实验仪器

GeneAmp® PCR system9700, ABI3730XL

### 2.3 实验步骤

DNA 提取后, 按以下体系进行反应扩增

|                    |       |
|--------------------|-------|
| ddH <sub>2</sub> O | 2 μl  |
| 2X Master Mix      | 5 μl  |
| 4X Primer Pair Mix | 2 μl  |
| DNA                | 1 μl  |
| <hr/>              |       |
| Total              | 10 μl |

PCR 扩增使用 Applied Biosystems 9700 PCR System 进行扩增, PCR 扩增程序如下:

|      |        |             |
|------|--------|-------------|
| 95°C | 10min  | } × 28Cycle |
| 95°C | 10 sec |             |
| 58°C | 1min   |             |
| 70°C | 20 sec |             |
| 60°C | 15 min |             |
| 4°C  | ∞      |             |

### 2.4 上机检测

内标混合: 将 PCR 产物与 STR 500 内标, HIDI 混合, 混合体系为

|         |       |
|---------|-------|
| STR-500 | 0.5μl |
| PCR 产物  | 1μl   |
| HIDI    | 8.5μL |
| <hr/>   |       |
| Total   | 10μL  |

将混合物在 PCR 仪上进行热变性 (95°C 3min40s), 冰中骤冷, 待上机。

使用仪器为 3730XL 按仪器操作说明书安装毛细管, 进行毛细管位置的校正, 人工手动灌胶和建立运行的测序文件。仪器将自动灌胶至毛细管, 1.2kV 预电泳 5min, 按编程次序自动进样, 再预电泳 (1.2kV, 20min), 在 7.5kV 下电泳 2h。电泳结束后仪器会自动清洗, 灌胶, 进下一样品, 预电泳和电泳。每一个样品电泳总时间为 2.5h。电泳结束后仪器会自动分析 STR 图谱。

### 3 实验结果

#### 3.1 LNCaP STR 数据

| STR 基因座  | LNCaP 检测结果 |          |          |          |
|----------|------------|----------|----------|----------|
|          | Allele 1   | Allele 2 | Allele 3 | Allele 4 |
| Yindel   | 2          |          |          |          |
| AMEL     | X          | Y        |          |          |
| D3S1358  | 16         |          |          |          |
| D13S317  | 10         | 12       |          |          |
| D7S820   | 9.1        | 10.3     |          |          |
| D16S539  | 11         |          |          |          |
| SE33     | 16         |          |          |          |
| D10S1248 | 14         | 16       |          |          |
| D5S818   | 11         | 12       |          |          |
| D21S11   | 29         | 32.2     |          |          |
| TPOX     | 8          | 9        |          |          |
| D1S1656  | 16         |          |          |          |
| D6S1043  | 11         | 12       | 18       |          |
| DXS6795  | 9          |          |          |          |
| D19S433  | 13.2       | 15       |          |          |
| D22S1045 | 15         | 17       |          |          |
| D8S1179  | 11         | 12       | 13       | 14       |
| Penta E  | 12         | 16       |          |          |
| DYS391   | 9          | 10       |          |          |
| D2S441   | 11.3       |          |          |          |
| D12S391  | 21         | 22       |          |          |
| D2S1338  | 16         |          |          |          |
| vWA      | 16         | 18       |          |          |
| Penta D  | 12         | 12.4     |          |          |
| TH01     | 9          |          |          |          |
| D18S51   | 11         | 12       |          |          |
| CSF1PO   | 10         | 11       |          |          |
| FGA      | 19         | 20       |          |          |

### 3.2 LNCaP STR 位点数据比对结果

通过 DSMZ 数据库/ATCC数据库/客户提供细胞信息比对结果如下

| EV          | Cell No.          | Cell name | Locus names |         |          |         |       |      |     |      |        |
|-------------|-------------------|-----------|-------------|---------|----------|---------|-------|------|-----|------|--------|
|             |                   |           | D5S818      | D13S317 | D7S820   | D16S539 | VWA   | TH01 | AM  | TPOX | CSF1PO |
|             | Query (Your Cell) |           | 11,12       | 10,12   | 9.1,10.3 | 11,11   | 16,18 | 9,9  | X,Y | 8,9  | 10,11  |
| 1.00(36/36) | 256               | LNCAP     | 11,12       | 10,12   | 9.1,10.3 | 11,11   | 16,18 | 9,9  | X,Y | 8,9  | 10,11  |

通过数据库比对，LNCaP 样本的 STR 结果符合数据库的 STR 信息。

注：参考 ANSI/ATCC, Authentication of Human Cell Line Standardization of STR Profiling . 2011, ASN-0002-2011. 标准，STR 检测匹配度超过 80% 即可认为是同一种来源的细胞。

### 3.3 LNCaP STR 图谱

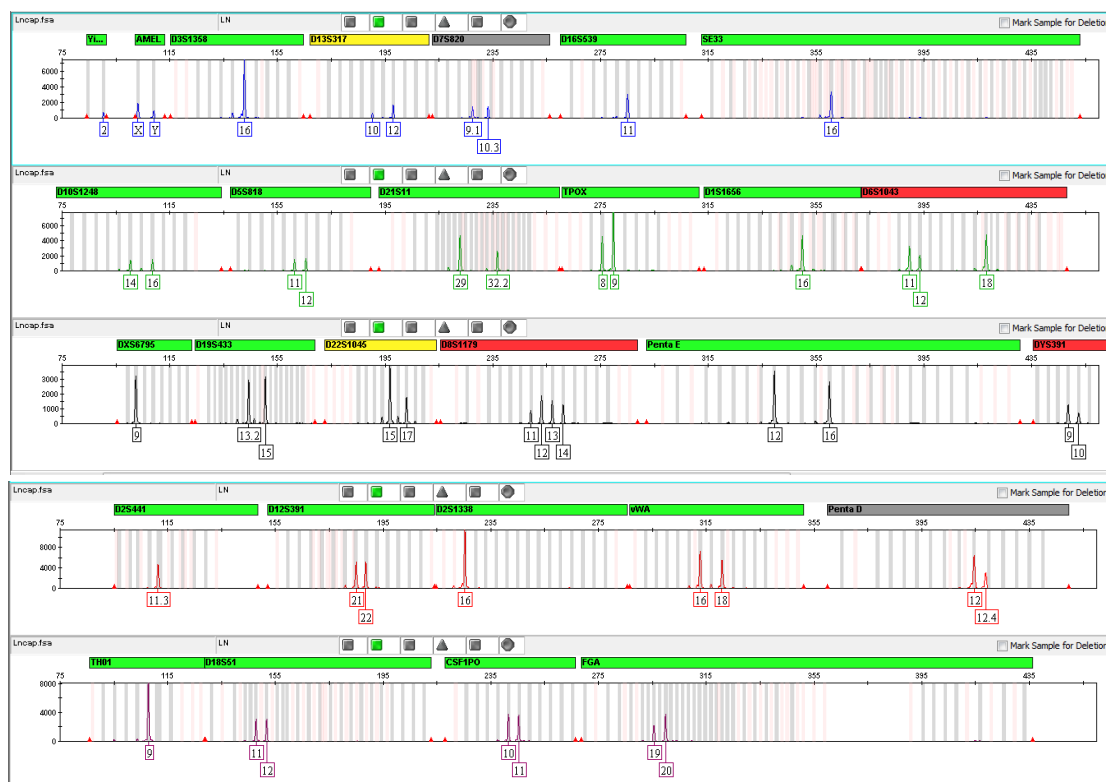

#### 4. 参考文献

- 1 Zhao, M., et al., Assembly and initial characterization of a panel of 85 genomically validated cell lines from diverse head and neck tumor sites. *Clin Cancer Res*, 2011. 17(23): p. 7248-64.
- 2 Masters, J.R., Cell-line authentication: End the scandal of false cell lines. *Nature*, 2012. 492(7428): p. 186.
- 3 American Type Culture Collection Standards Development Organization Workgroup, A.S.N., Authentication of Human Cell Lines: Standardization of STR Profiling. 2011, ANSI/ATCC ASN-0002-2011.
- 4 Reid, Y.A., Characterization and authentication of cancer cell lines: an overview. *Methods Mol Biol*, 2011. 731: p. 35-43.
- 5 Lorsch, J.R., F.S. Collins, and J. Lippincott-Schwartz, Cell Biology. Fixing problems with cell lines. *Science*, 2014. 346(6216): p. 1452-3.
- 6 Chatterjee, R., Cell biology. Cases of mistaken identity. *Science*, 2007. 315(5814): p. 928-31.
