# Supplementary material for: N-glycosylation of GDF15 abolishes its inhibitory effect on EGFR in AR inhibitor-resistant prostate cancer cells
Source: PubMed Central journal article supplement (PMC9296468; doi:10.1038/s41419-022-05090-3), 2022-07-19
Supplement: 41419_2022_5090_MOESM13_ESM.pdf [file 41419_2022_5090_MOESM13_ESM.pdf]

# STR 细胞鉴定结题报告

订单编号: F21FTSCCLH0006

报告时间: 2021.01.29

# 目录

|                                     |   |
|-------------------------------------|---|
| <b>1 实验目的</b> .....                 | 3 |
| <b>2 实验流程</b> .....                 | 3 |
| <b>2.1 实验试剂</b> .....               | 3 |
| <b>2.2 实验仪器</b> .....               | 3 |
| <b>2.3 实验步骤</b> .....               | 3 |
| <b>2.4 上机检测</b> .....               | 3 |
| <b>3 实验结果</b> .....                 | 4 |
| <b>3.1 22RV1 STR 数据</b> .....       | 4 |
| <b>3.2 22RV1 STR 位点数据比对结果</b> ..... | 5 |
| <b>3.3 22RV1 STR 图谱</b> .....       | 5 |
| <b>4. 参考文献</b> .....                | 6 |

## 1 实验目的

细胞STR 信息鉴定：22RV1 人前列腺癌细胞

## 2 实验流程

### 2.1 实验试剂

Investigator® 24plex GO!Kit (200)

### 2.2 实验仪器

GeneAmp® PCR system9700, ABI3730XL

### 2.3 实验步骤

DNA 提取后，按以下体系进行反应扩增

|                    |    |    |
|--------------------|----|----|
| ddH2O              | 2  | μl |
| 2X Master Mix      | 5  | μl |
| 4X Primer Pair Mix | 2  | μl |
| DNA                | 1  | μl |
| <hr/>              |    |    |
| Total              | 10 | μl |

PCR 扩增使用Applied Biosystems 9700 PCR System 进行扩增，PCR 扩增程序如下：

|      |        |            |
|------|--------|------------|
| 95°C | 10 min | } ×28Cycle |
| 95°C | 10 sec |            |
| 58°C | 1min   |            |
| 70°C | 20 sec |            |
| 60°C | 15min  |            |
| 4°C  | ∞      |            |

### 2.4 上机检测

内标混合：将PCR 产物与STR 500 内标，HIDI 混合，混合体系为

|         |       |
|---------|-------|
| STR-500 | 0.5μl |
| PCR 产物  | 1μl   |
| HIDI    | 8.5μL |
| <hr/>   |       |
| Total   | 10μL  |

将混合物在PCR 仪上进行热变性（95°C3min40s），冰中骤冷，待上机。

使用仪器为 3730XL 按仪器操作说明书安装毛细管，进行毛细管位置的校正，人工手动灌胶和建立运行的测序文件。仪器将自动灌胶至毛细管，1.2kV 预电泳 5min，按编程次序自动进样，再预电泳（1.2kV，20min），在 7.5kV 下电泳 2h。电泳结束后仪器会自动清洗，灌胶，进下一样品，预电泳和电泳。每一个样品电泳总时间为 2.5h。电泳结束后仪器会自动分析 STR 图谱。

### 3 实验结果

#### 3.1 22RV1 STR 数据

| STR 基因座  | 22RV1 检测结果 |          |          |
|----------|------------|----------|----------|
|          | Allele 1   | Allele 2 | Allele 3 |
| AM       | X          | Y        |          |
| TH01     | 6          | 9.3      |          |
| D3S1358  | 15         |          |          |
| vWA      | 15         | 21       |          |
| D21S11   | 30         |          |          |
| TPOX     | 8          |          |          |
| DYS391   | 11         |          |          |
| D1S1656  | 17         | 18       | 19       |
| D12S391  | 18         | 25       |          |
| SE33     | 24.2       | 30.2     | 31.2     |
| D10S1248 | 13         | 14       |          |
| D22S1045 | 15         |          |          |
| D19S433  | 13         | 14       |          |
| D8S1179  | 12         | 13       | 14       |
| D2S1338  | 17         | 18       |          |
| D2S441   | 10         | 12       |          |
| D18S51   | 13         | 14       |          |
| FGA      | 20         | 23       |          |
| QS1      | Q          |          |          |
| D16S539  | 12         |          |          |
| CSF1PO   | 10         | 11       |          |
| D13S317  | 8          | 12       |          |
| D5S818   | 11         | 13       |          |
| D7S820   | 9          | 10       | 11       |
| QS2      | S          |          |          |

### 3.2 22RV1 STR 位点数据比对结果

通过DSMZ 数据库/ATCC数据库/客户提供细胞信息比对结果如下

| EV          | Cell No.          | Cell name | Locus names |         |         |         |       |       |     |      |        |
|-------------|-------------------|-----------|-------------|---------|---------|---------|-------|-------|-----|------|--------|
|             |                   |           | D5S818      | D13S317 | D7S820  | D16S539 | VWA   | TH01  | AM  | TPOX | CSF1PO |
|             | Query (Your Cell) |           | 11,13       | 8,12    | 9,10,11 | 12,12   | 15,21 | 6,9,3 | X,Y | 8,8  | 10,11  |
| 0.92(36/39) | 438               | 22RV1     | 11,12,13    | 9,12    | 10,11,9 | 12,12   | 15,21 | 6,9,3 | X,Y | 8,8  | 10,11  |
| 0.92(36/39) | CRL-2505          | 22Rv1     | 11,12,13    | 9,12    | 9,10,11 | 12,12   | 15,21 | 6,9,3 | X,Y | 8,8  | 10,11  |

通过数据库比对，22RV1 样本的 STR 结果符合数据库的 STR 信息。

注：参考 ANSI/ATCC,Authentication of Human Cell Line Standardization of STR Profiling . 2011,ASN-0002-2011.标准，STR 检测匹配度超过 80%即可认为是同一种来源的细胞。

### 3.3 22RV1 STR 图谱

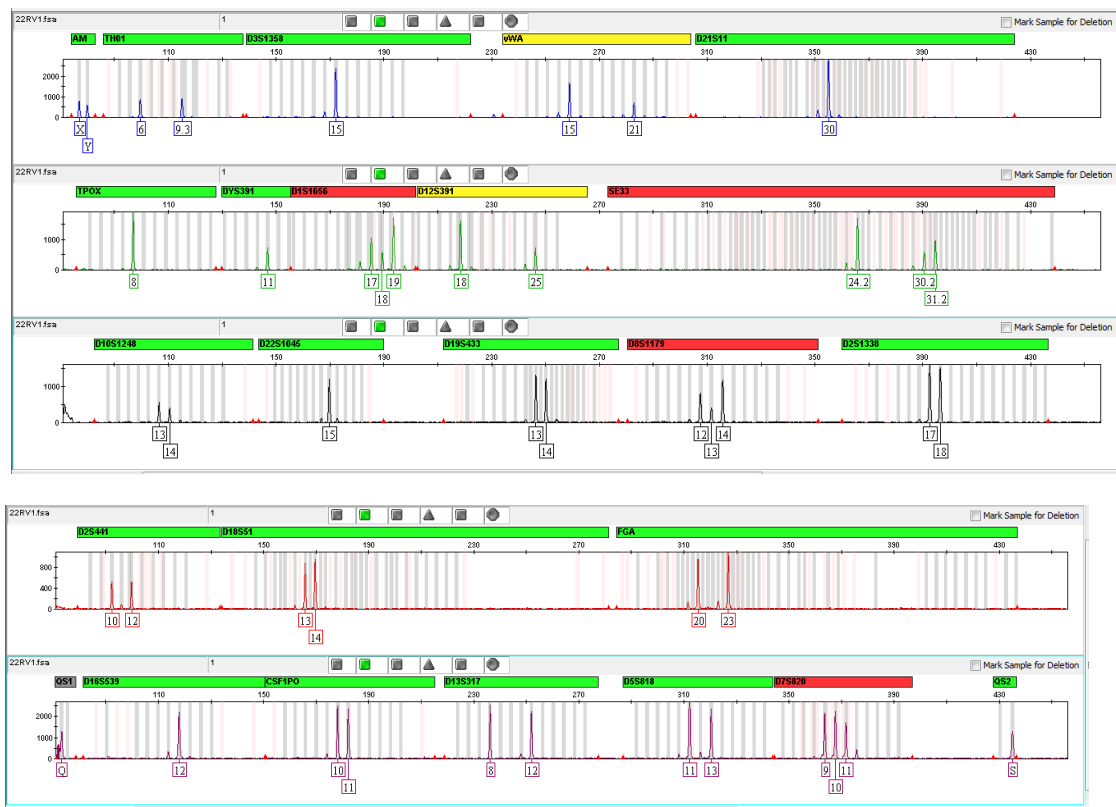

#### 4. 参考文献

- 1 Zhao, M., et al., Assembly and initial characterization of a panel of 85 genomically validated cell lines from diverse head and neck tumor sites. *Clin Cancer Res*, 2011. 17(23): p. 7248-64.
- 2 Masters, J.R., Cell-line authentication: End the scandal of false cell lines. *Nature*, 2012. 492(7428): p. 186.
- 3 American Type Culture Collection Standards Development Organization Workgroup, A.S.N., Authentication of Human Cell Lines: Standardization of STR Profiling. 2011, ANSI/ATCC ASN-0002-2011.
- 4 Reid, Y.A., Characterization and authentication of cancer cell lines: an overview. *Methods Mol Biol*, 2011. 731: p. 35-43.
- 5 Lorsch, J.R., F.S. Collins, and J. Lippincott-Schwartz, Cell Biology. Fixing problems with cell lines. *Science*, 2014. 346(6216): p. 1452-3.
- 6 Chatterjee, R., Cell biology. Cases of mistaken identity. *Science*, 2007. 315(5814): p. 928-31.
