# Supplementary material for: N-glycosylation of GDF15 abolishes its inhibitory effect on EGFR in AR inhibitor-resistant prostate cancer cells
Source: PubMed Central journal article supplement (PMC9296468; doi:10.1038/s41419-022-05090-3), 2022-07-19

# 22Rv1（人前列腺癌细胞）支原体检测实验操作报告

## 1 主要仪器试剂

### 1.1 主要仪器

表 1.1 实验所用主要仪器

Main instruments for the experiment

| 所用仪器          | 仪器型号                 | 公司                   |
|---------------|----------------------|----------------------|
| 全功能微孔板检测仪     | PerkinElmer/envision | PerkinElmer/envision |
| 冷冻离心机         | neofuge 15R          | Heal force           |
| 电热恒温水浴锅       | HH-US-A              | 美标                   |
| Aquapro 超级纯水仪 | 艾科浦                  | AJY -0501            |
| PCR 仪         | 东胜创新生物科技有限公司         | EDC-810              |
| 水平电泳仪         | 北京君意东方电泳设备有限公司       | JY300                |
| 电子天平          | 北京赛多利斯仪器系统有限公司       | CPA                  |

### 1.2 主要试剂

支原体 PCR 检测试剂盒

## 2 实验内容

### 2.1 实验流程

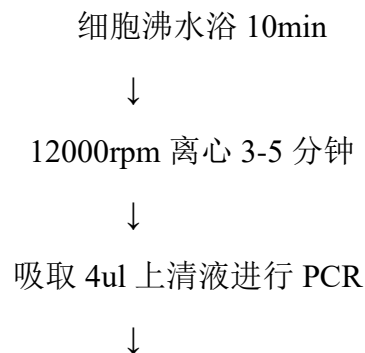

## 配制 2%琼脂胶电泳

↓

得到胶图

↓

## 2.2 实验操作

### 2.2.1 实验步骤

- (1) 将细胞沉淀及上清混匀，进行沸水浴10min。
- (2) 12000rp离心3-5min后取上清备用。
- (3) 配制PCR反应体系，如下表：

| 成分               | 阴性对照 | 阳性对照 | 实验组  |
|------------------|------|------|------|
| PCR 反应液          | 14ul | 14ul | 14ul |
| 引物               | 2ul  | 2ul  | 2ul  |
| 阳性对照             | 4ul  | -    | -    |
| 待测样品             | -    | -    | 4ul  |
| H <sub>2</sub> O | 4ul  | -    | -    |

反应程序如下：

94°C 5min  
30cycle {  
  94°C 130s  
  55°C 30s  
  72°C 15s  
94°C 5min

(4) 琼脂糖凝胶电泳。

(5) 凝胶成像分析。

## 3. 实验结果与分析

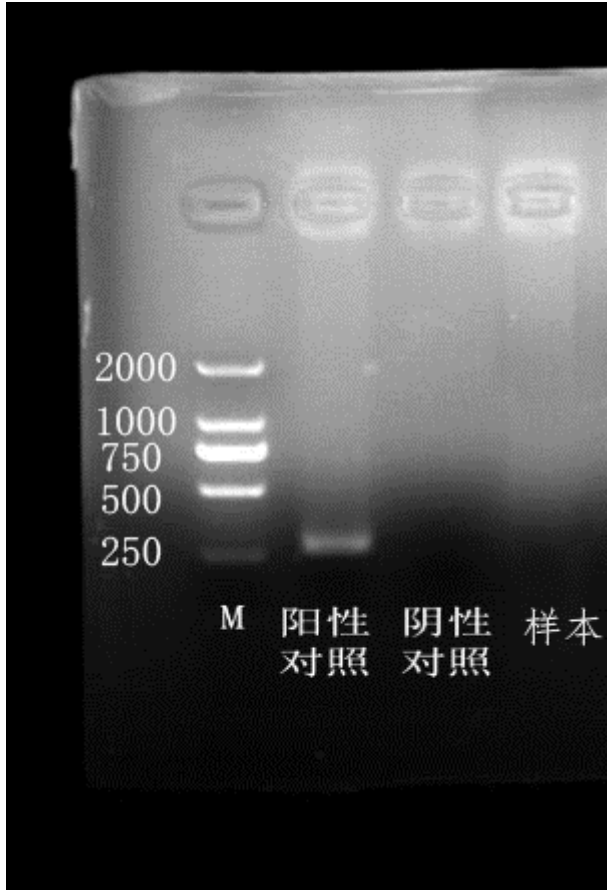

附图：支原体检测凝胶图谱

电泳图检测结果显示：

- ① 实验中阳性对照有条带，阴性对照无条带，证明本次实验结果准确可靠。
- ② 样本 22Rv1（人前列腺癌细胞）无条带，为支原体阴性。

操作人：明林峰

检测日期：2022.03.10

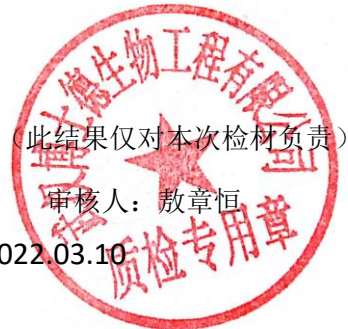

Supplement: 41419_2022_5090_MOESM14_ESM.pdf [file 41419_2022_5090_MOESM14_ESM.pdf]
